# Supplementary material
Source: PubMed Central journal article supplement (PMC1308883)
Supplement: pnas_0503082102_3.pdf [file pnas_0503082102_3.pdf]

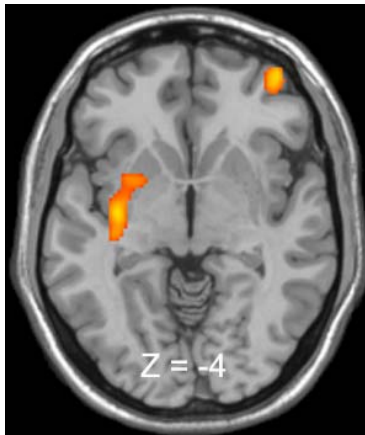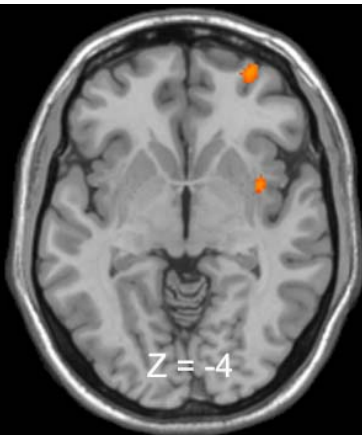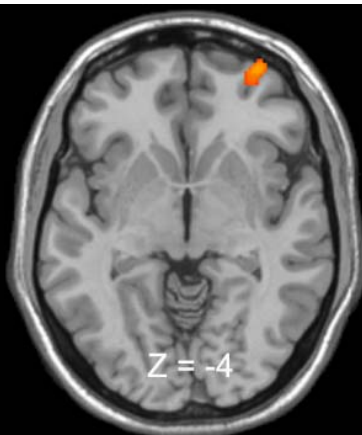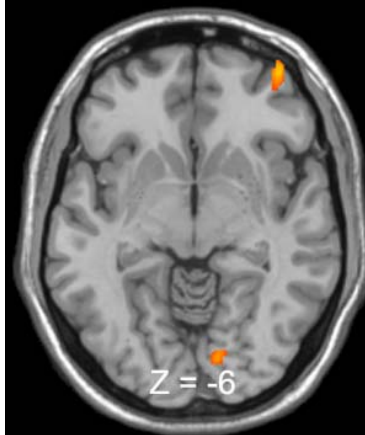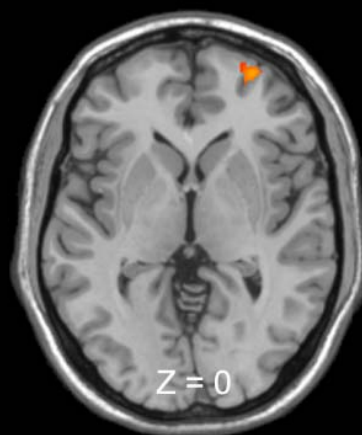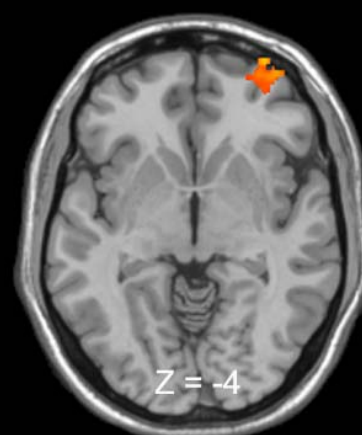

CBF during Task vs.  
Perceived Stress

Baseline CBF vs.  
Perceived Stress

Baseline CBF vs.  
AUC Cortisol
