# Supplementary material
Source: PubMed Central journal article supplement (PMC1308883)
Supplement: pnas_0503082102_4.pdf [file pnas_0503082102_4.pdf]

Single Covariate

Stress + Anxiety Covariates

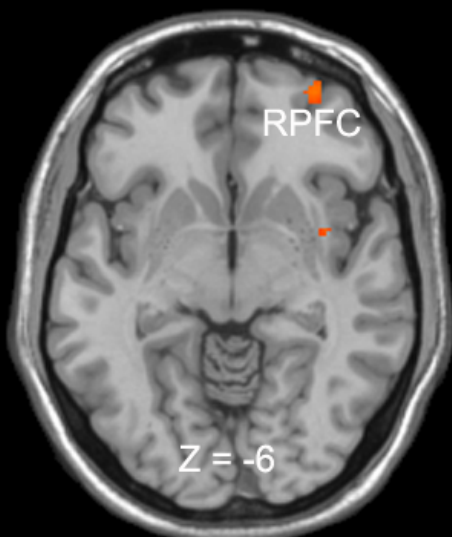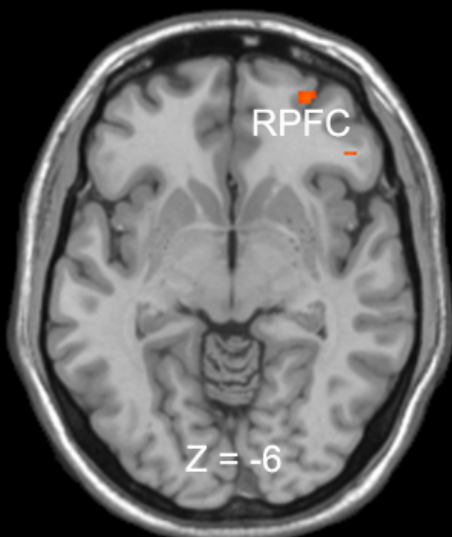

Baseline CBF vs. Perceived Stress

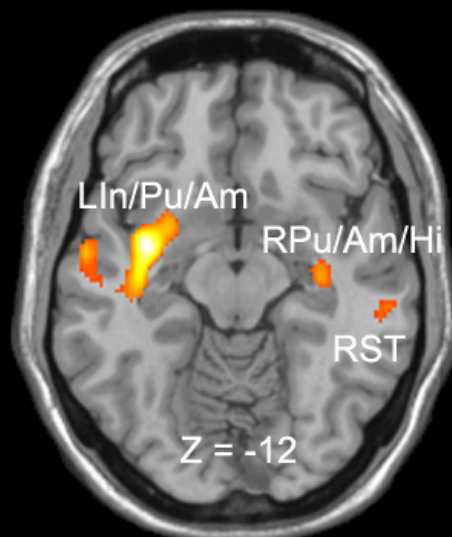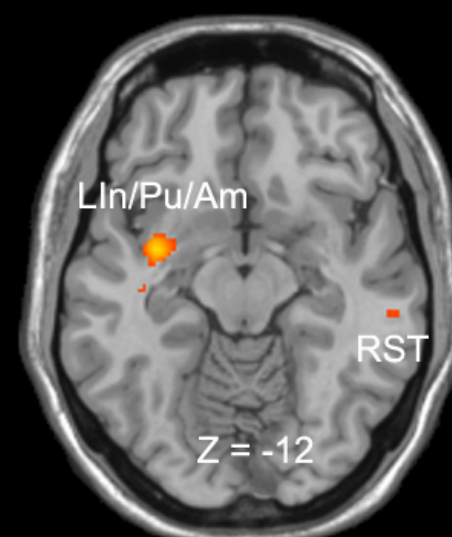

CBF during Task vs. Perceived Anxiety
