# Supplementary material
Source: PubMed Central journal article supplement (PMC1308883)

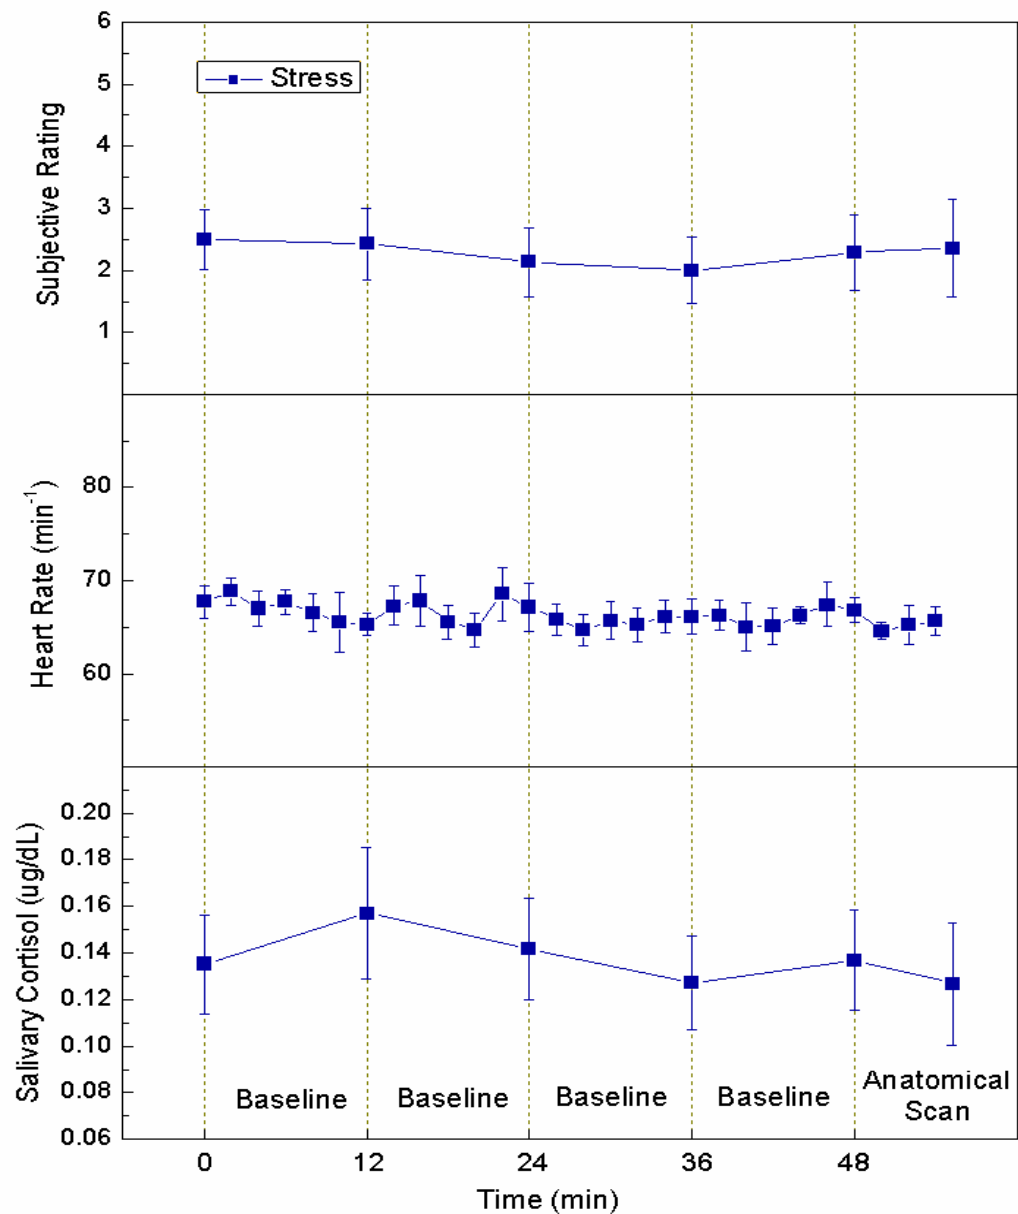

Supplement: pnas_0503082102_1.pdf [file pnas_0503082102_1.pdf]

Z = 5

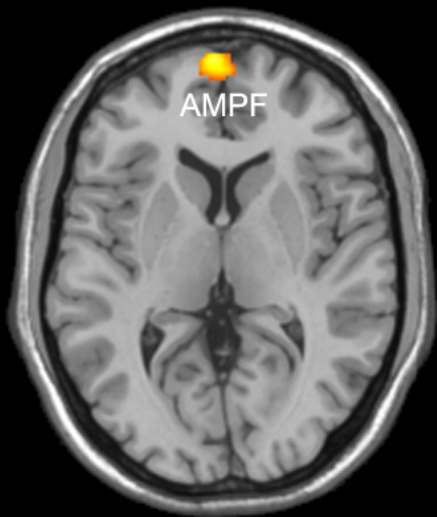

AMPF

X = 0

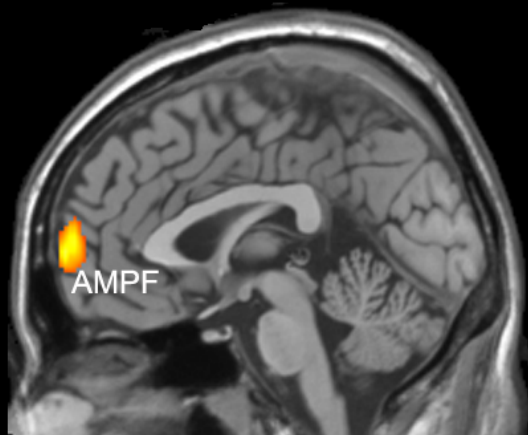

AMPF

CBF during Task vs. AUC Cortisol

Supplement: pnas_0503082102_2.pdf [file pnas_0503082102_2.pdf]

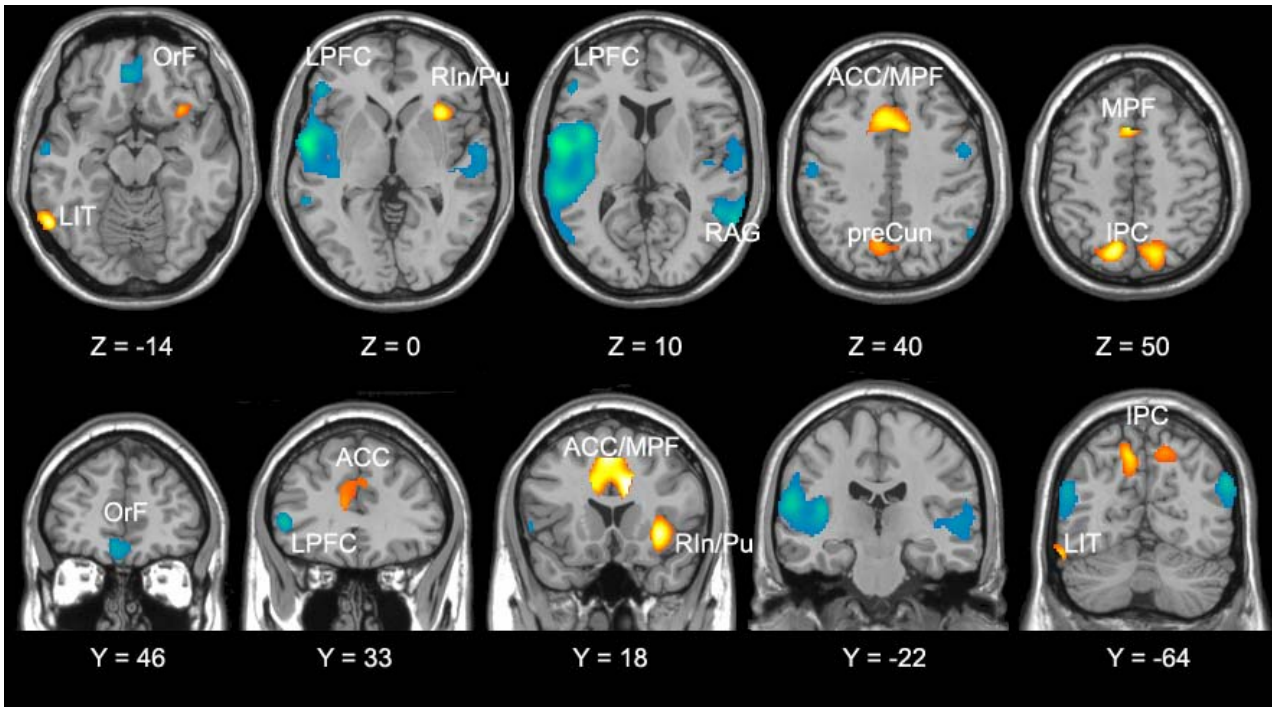

Supplement: pnas_0503082102_5.pdf [file pnas_0503082102_5.pdf]

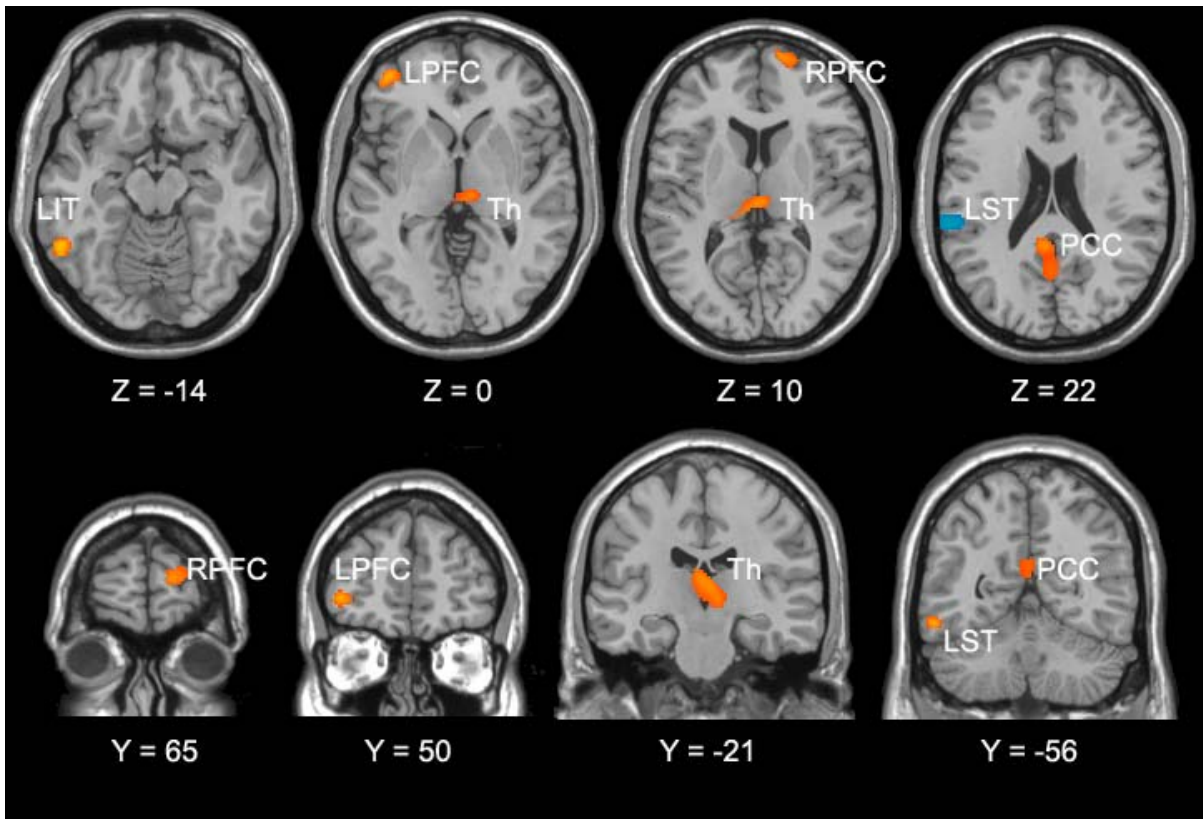

Supplement: pnas_0503082102_6.pdf [file pnas_0503082102_6.pdf]
